# Supplementary material
Source: PubMed Central journal article supplement (PMC4849831)
Supplement: ASN.2015040411_ASN2015040411SupplementaryData.pdf [file ASN.2015040411_ASN2015040411SupplementaryData.pdf]

**SUPPLEMENTAL INFORMATION****SUPPLEMENTAL METHODS*****SGLT2* sequencing primers**

For *SGLT2*, the following primers (5' – 3') were employed:

|                 |                       |
|-----------------|-----------------------|
| 5A2ex1_F        | gtgctcttgaacttgaaggg  |
| 5A2ex1_R        | tcagctagcacagtcccaaa  |
| 5A2ex2_3_F      | tgggattagagcctgggtg   |
| 5A2ex2_3_R      | cctctgcttctggctagat   |
| 5A2ex4_5_F      | gagggtgcagctctgttc    |
| 5A2ex4_5_R      | ttccagaccttccagctg    |
| 5A2ex6_7_F      | cccgagaacaggctatcgtt  |
| 5A2ex6_7_R      | tgcacgcttggagtagatgg  |
| 5A2ex8_9_F      | aaggctccatctactccaagc |
| 5A2ex8_9_R      | ggctgccttaccgttg      |
| 5A2ex9_10_11_F  | ccagttccgtcacctccta   |
| 5A2ex9_10_11_R  | gccaggtagctagagactgc  |
| 5A2ex11_12_F    | tctgggtgggttcatcgtg   |
| 5A2ex11_12_R    | cccattccaaccctcagtc   |
| 5A2ex13_14_F    | actggacagaggtggtagg   |
| 5A2ex13_14_R    | ctgccccctccccctttctg  |
| 5A2ex10_11_12_F | gctggcctccatcttcaaca  |
| 5A2ex10_11_12_R | cagagggtaggtgctgtgctc |

SUPPLEMENTAL FIGURES

Supplemental Figure 1

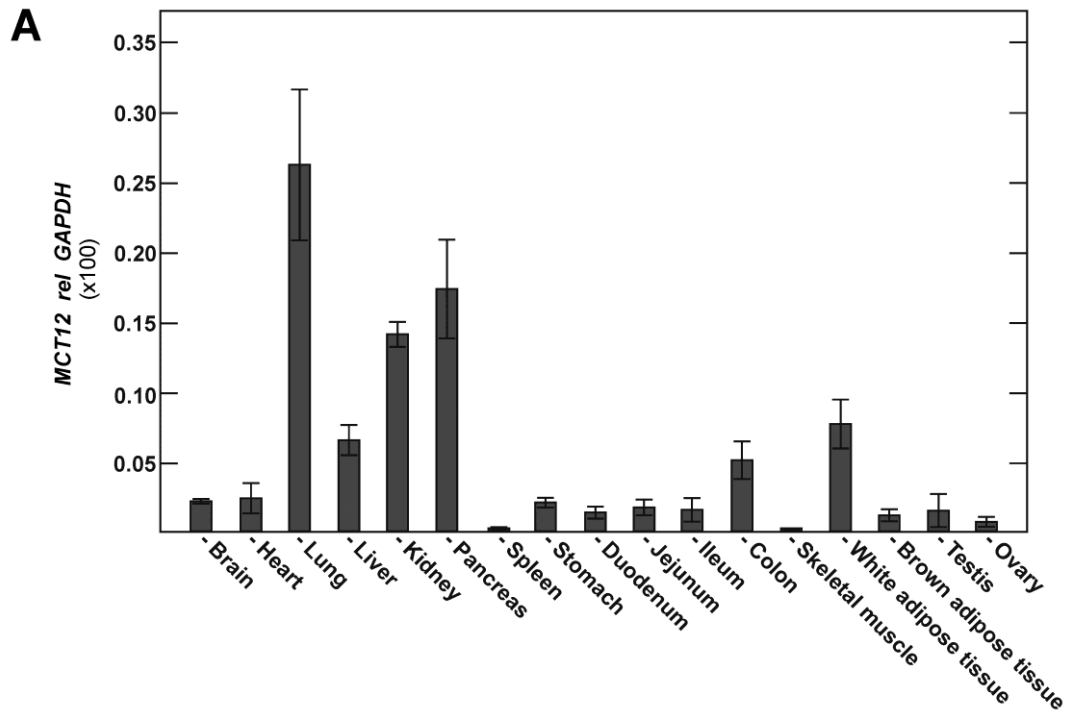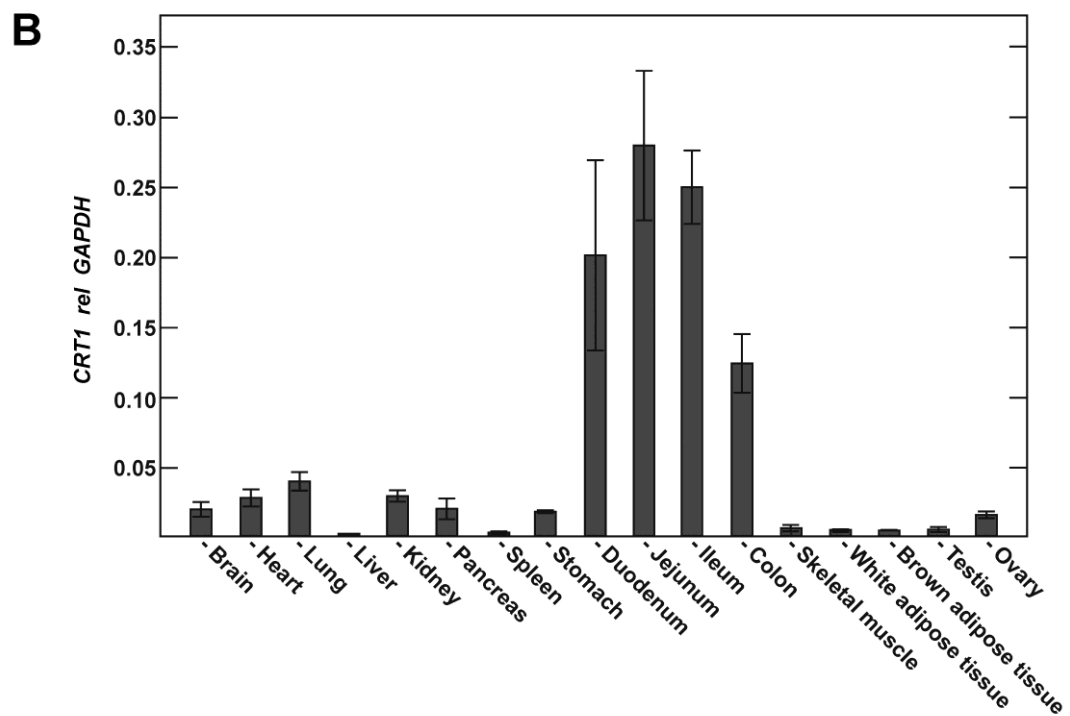

Supplemental Figure 2

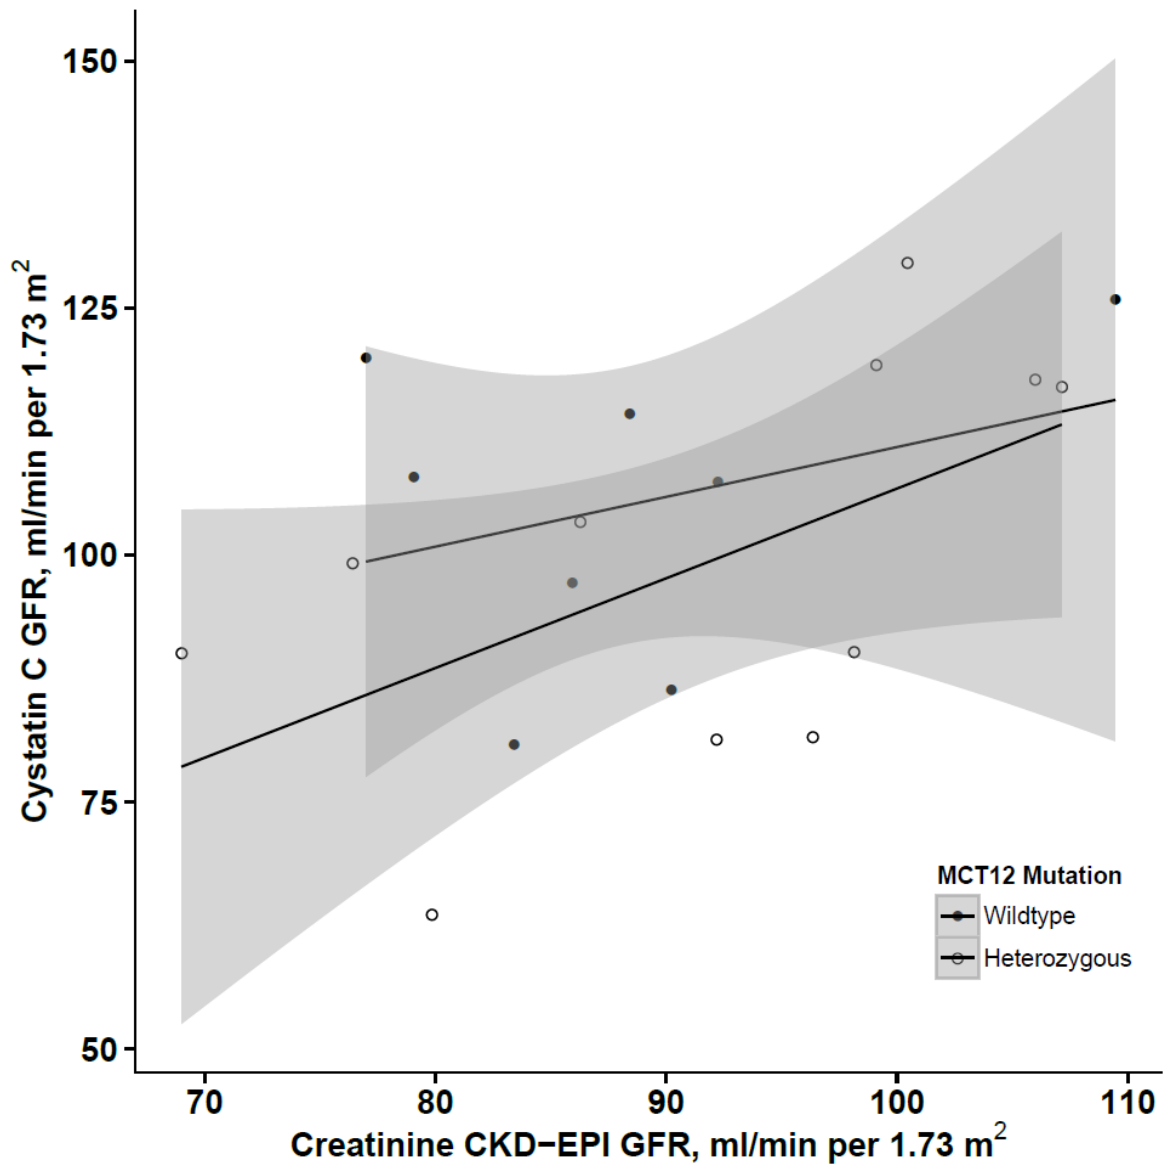

## Supplemental Figure Legends

**Figure 1. Expression of creatine transporters MCT12 and CRT1 in different murine tissues.** Indicated tissues were harvested, total RNA isolated and reverse transcribed.

Expression of MCT12 (A) or CRT1 (B) transcripts was quantified by taqman-based real-time PCR and normalized to GAPDH transcript levels. N=3 male (or female in the case of ovarian tissue) 10-12 week old mice were used. Data are means  $\pm$  SD.

**Figure 2. Association of creatinine based eGFR with cystatin C based eGFR.** Lower regression line with open circles: individuals with *MCT12* mutation. Upper regression line with filled circles: individuals without *MCT12* mutation. Grey shaded bands around the regression lines represent the lower and upper limits of the 95% confidence intervals.



| MCT12 Mutation       | Yes          |             |        |        |        |        |         |        |        |        |        |        |        | No     |        |        |        |        |        |        |         |        |               |                    |                     |               | MCT12 Mutation yes Median (IQR) | MCT12 Mutation no Median (IQR) | Mann-Whitney U test p-value | SGLT2 Mutation yes Median (IQR) | SGLT2 Mutation no Median (IQR) | Mann-Whitney U test p-value |
|----------------------|--------------|-------------|--------|--------|--------|--------|---------|--------|--------|--------|--------|--------|--------|--------|--------|--------|--------|--------|--------|--------|---------|--------|---------------|--------------------|---------------------|---------------|---------------------------------|--------------------------------|-----------------------------|---------------------------------|--------------------------------|-----------------------------|
|                      | Yes          | Yes         | Yes    | Yes    | Yes    | Yes    | Yes     | Yes    | Yes    | Yes    | Yes    | Yes    | Yes    | Yes    | No      | No     | No            | No                 | No                  | No            |                                 |                                |                             |                                 |                                |                             |
| SGLT2 Mutation       | Yes          | Yes         | Yes    | Yes    | Yes    | No     | No      | No     | No     | No     | No     | No     | No     | No     | No     | No     | No     | No     | No     | No     | No      | No     | No            | No                 | No                  | No            | No                              | No                             |                             |                                 |                                |                             |
| Patient              | II-1         | II-3        | II-7   | III-4  | III-7  | II-5   | II-9    | III-1  | III-2  | III-5  | III-8  | II-2   | II-4   | II-8   | II-10  | II-11  | III-6  | III-10 | III-11 | III-12 | III-13  |        |               |                    |                     |               |                                 |                                |                             |                                 |                                |                             |
| Urinary parameters   | Normal range | Unit        |        |        |        |        |         |        |        |        |        |        |        |        |        |        |        |        |        |        |         |        |               |                    |                     |               |                                 |                                |                             |                                 |                                |                             |
| 24 hr urinary volume |              | ml          | 1500   | 1326   | 852    | 1320   | 1971    | 1950   | 1108   | 1224   | 2114   | 1780   | 1214   | 1472   | 1402   | 861    | 626    | 1958   | 968    | 1192   | 1478    | 2640   | 2620          | 1326 (1219-1865)   | 1437 (1024-1838)    | 0.92          | 1326 (1320-1500)                | 1437 (1171-1952)               | 0.90                        |                                 |                                |                             |
| pH                   |              |             | 4.68   | 5.09   | ND     | 5.07   | ND      | ND     | 4.88   | 6.67   | 6.33   | ND     | ND     | 5.71   | 5.44   | ND     | 5.75   | 5.46   | 6.32   | 5.14   | 5.76    | ND     | 5.23          | 5.08 (4.93-6.02)   | 5.59 (5.39-5.75)    | 0.34          | 5.07 (4.88-5.08)                | 5.71 (5.34-6.04)               | 0.022                       |                                 |                                |                             |
| Na                   | 100 - 300    | mmol/ 24 hr | 142.50 | 164.42 | 145.69 | 147.84 | 416.19  | 101.40 | 116.34 | 149.33 | 234.65 | 112.14 | 120.19 | 144.26 | 133.19 | 180.81 | 75.75  | 225.17 | 81.31  | 107.28 | 292.64  | 208.56 | 86.46         | 146 (118-157)      | 139 (92-202)        | 0.60          | 148 (146-164)                   | 127 (106-188)                  | 0.21                        |                                 |                                |                             |
| K                    | 25 - 125     | mmol/ 24 hr | 46.50  | 66.30  | 49.42  | 38.28  | 49.59   | 31.20  | 64.26  | 35.50  | 93.02  | 28.48  | 54.63  | 48.58  | 68.70  | 54.24  | 38.19  | 86.15  | 36.78  | 61.98  | 110.85  | 71.28  | 49.78         | 49 (37-60)         | 58 (49-71)          | 0.25          | 49 (47-55)                      | 54 (38-69)                     | 0.78                        |                                 |                                |                             |
| Cl                   | 110 - 250    | mmol/ 24 hr | 130.50 | 152.49 | 149.95 | 145.20 | 357.74  | 85.80  | 118.56 | 135.86 | 232.54 | 92.56  | 120.19 | 128.06 | 120.57 | 169.62 | 82.63  | 203.63 | 73.57  | 120.39 | 232.05  | 163.68 | 65.50         | 136 (119-151)      | 124 (92-168)        | 0.65          | 150 (145-152)                   | 120 (91-165)                   | 0.13                        |                                 |                                |                             |
| Ca                   | 2.50 - 7.50  | mmol/ 24 hr | 4.01   | 4.71   | 6.99   | 6.85   | 3.75    | 2.75   | 5.40   | 3.08   | 6.68   | 3.54   | 2.73   | 5.28   | 2.96   | 3.68   | 4.58   | 6.52   | 2.20   | 2.72   | 6.53    | 3.27   | 8.28          | 4.18 (3.31-6.04)   | 4.13 (3.04-6.21)    | 0.70          | 4.71 (4.18-6.85)                | 3.61 (2.91-5.68)               | 0.15                        |                                 |                                |                             |
| Pi                   | 13.0 - 42.0  | mmol/ 24 hr | 26.13  | 37.01  | 23.82  | 14.47  | 33.03   | 9.95   | 30.57  | 11.13  | 38.31  | 19.19  | 19.97  | 14.53  | 24.20  | 18.43  | 18.92  | 35.99  | 15.71  | 27.94  | 52.34   | 27.03  | 48.00         | 24 (17-34)         | 26 (19-34)          | 0.65          | 26 (24-37)                      | 22 (18-32)                     | 0.72                        |                                 |                                |                             |
| Glucose              | < 1.0        | mmol/ 24 hr | 6.71   | 11.77  | 5.54   | 6.53   | 1.10    | 0      | 32.48  | 0      | 0.36   | 0      | 0.55   | 0      | 0.27   | 0.33   | 0.19   | 0.39   | 0.36   | 0.41   | 0.64    | 0      | 0             | 1.104 (0.248-6.62) | 0.297 (0.187-0.383) | 0.11          | 6.53 (5.54-6.71)                | 0.27 (0.16-0.38)               | 0.00013                     |                                 |                                |                             |
| Uric acid            | < 5900       | µmol/ 24 hr | 1605   | 2466   | 3096   | 1746   | 6165    | 1576   | 3597   | 1412   | 4444   | 1760   | 2750   | 841    | 2332   | 3748   | 2479   | 3963   | 2154   | 2539   | 4598    | 4060   | 3039          | 2466 (1676-3346)   | 2789 (2368-3909)    | 0.47          | 2466 (1746-3096)                | 2644 (2055-3802)               | 0.90                        |                                 |                                |                             |
| Urea                 | 91.0 - 435.0 | mmol/ 24 hr | 287    | 369    | 337    | 224    | 583     | 199    | 394    | 155    | 602    | 234    | 337    | 268    | 322    | 361    | 247    | 472    | 255    | 311    | 552     | 399    | 488           | 341 (279-454)      | 329 (253-417)       | 0.51          | 341 (279-454)                   | 329 (253-417)                  | 0.90                        |                                 |                                |                             |
| Creatinine           | 6300 - 13400 | µmol/ 24hr  | 7658   | 10011  | 12204  | 8987   | 20939   | 7092   | 16148  | 5062   | 17717  | 8816   | 9695   | 9334   | 10662  | 12397  | 6540   | 18139  | 8725   | 11472  | 18006   | 15019  | 21877         | 9695 (8237-14176)  | 11934 (9666-17260)  | 0.35          | 10011 (8987-12204)              | 11067 (8793-16540)             | 1.00                        |                                 |                                |                             |
| Protein              |              | g/ 24 hr    | <0.15  | <0.15  | <0.15  | <0.15  | <0.15   | <0.15  | <0.15  | <0.15  | <0.15  | <0.15  | <0.15  | <0.15  | <0.15  | <0.15  | <0.15  | <0.15  | <0.15  | <0.15  | <0.15   | <0.15  | <0.15         | 0.07 (0.07-0.07)   | 0.07 (0.07-0.07)    | 1.00          | 0.07 (0.07-0.07)                | 0.07 (0.07-0.07)               | 1.00                        |                                 |                                |                             |
| Mg                   | 2.50 - 8.50  | mmol/ 24 hr | 4.11   | 8.00   | 3.97   | 2.65   | 3.58    | 1.93   | 6.18   | 2.24   | 4.33   | 3.26   | 3.23   | 2.30   | 3.72   | 6.93   | 3.26   | 3.78   | 1.42   | 4.18   | 6.59    | 3.64   | 7.02          | 2.05 (1.92-3.7)    | 2.67 (1.65-4.22)    | 1.00          | 2.74 (2.02-4.66)                | 2.35 (1.76-3.75)               | 0.28                        |                                 |                                |                             |
| Albumin              | < 30.0       | mg/ 24 hr   | 0      | 7.96   | 16.19  | 11.88  | 19.48   | 0      | 4.43   | 6.12   | 0      | 0      | 0      | 22.08  | 14.02  | ND     | 5.63   | 0      | 4.84   | 0.00   | 10.35   | 0      | 13.10         | 4.43 (0-9.92)      | 5.63 (0-13.1)       | 0.58          | 11.88 (7.96-16.19)              | 4.43 (0-8.23)                  | 0.13                        |                                 |                                |                             |
| Citrate              | 1.93 - 6.6   | mmol/ 24 hr | 1.71   | 4.36   | 0.34   | 3.91   | 2.74    | 2.73   | 4.10   | 1.71   | 3.72   | 2.37   | 4.10   | 2.46   | 3.81   | 0.38   | 3.42   | 3.84   | 2.30   | 5.63   | 9.40    | 2.40   | 1.68          | 2.74 (2.04-4)      | 2.94 (2.33-3.83)    | 1.00          | 2.74 (1.71-3.91)                | 3.07 (2.35-3.9)                | 0.78                        |                                 |                                |                             |
| Oxalate              | <500         | µmol/ 24 hr | 244.50 | 176.36 | 17.04  | 260.04 | 248.35  | 120.90 | 407.74 | 178.70 | 181.80 | 176.22 | 195.45 | 189.89 | 271.99 | 34.44  | 197.82 | 354.40 | 142.30 | 251.51 | 809.94  | 356.40 | 345.84        | 182 (176-246)      | 262 (192-352)       | 0.15          | 245 (176-248)                   | 197 (178-348)                  | 0.55                        |                                 |                                |                             |
| Glycolate            | 150 - 600    | µmol/ 24 hr | 280.50 | 433.60 | 580.21 | 419.76 | 1393.50 | 317.85 | 221.60 | 244.80 | 471.42 | 341.76 | 276.79 | 385.66 | 308.44 | 570.84 | 212.84 | 372.02 | 212.96 | 356.41 | 1578.50 | 316.80 | 209.60        | 342 (279-453)      | 337 (237-382)       | 0.56          | 434 (420-580)                   | 317 (239-375)                  | 0.08                        |                                 |                                |                             |
| Sulfate              |              | µmol/ 24 hr | 15.60  | 17.86  | 2.73   | 16.33  | 32.13   | 10.12  | 33.69  | 7.23   | 31.73  | 15.50  | 16.64  | 13.87  | 16.49  | 2.28   | 15.27  | 27.57  | 11.71  | 16.24  | 26.94   | 24.26  | 28.51         | 116 (13-25)        | 16 (14-26)          | 0.86          | 16 (16-18)                      | 16 (13-27)                     | 0.97                        |                                 |                                |                             |
| Taurine              | < 180        | µmol/ 24 hr | 70     | 190    | 222    | 53     | 4325    | 38     | 116    | 20     | 791    | 1287   | 60     | 114    | 204    | 721    | 107    | 1620   | 5      | 60     | 202     | 3078   | 3459          | 116 (56-507)       | 203 (109-1395)      | 0.47          | 190 (70-222)                    | 159 (69-915)                   | 0.90                        |                                 |                                |                             |
| Asparagic acid       | < 10         | µmol/ 24 hr | 39     | 9      | 99     | 4      | 12      | 4      | 83     | 15     | 10     | 5      | 5      | 5      | 6      | 63     | 33     | 9      | 5      | 36     | 9       | 8      | 11            | 10.14 (4.86-27.05) | 9.19 (6.72-7.79)    | 0.97          | 11.75 (8.63-38.82)              | 9.19 (5.07-9.8)                | 0.49                        |                                 |                                |                             |
| Threonine            | < 40         | µmol/ 24 hr | 116    | 69     | 148    | 133    | 423     | 69     | 116    | 81     | 142    | 142    | 140    | 67     | 115    | 177    | 254    | 239    | 163    | 742    | 349     | 231    | 154           | 133 (99-142)       | 204 (156-250)       | 0.043         | 133 (116-148)                   | 148 (116-233)                  | 0.66                        |                                 |                                |                             |
| Serine               | < 70         | µmol/ 24 hr | 272    | 242    | 433    | 318    | 870     | 169    | 364    | 183    | 426    | 397    | 548    | 29     | 382    | 455    | 467    | 552    | 1555   | 753    | 493     | 375    | 364 (257-429) | 461 (376-537)      | 0.22                | 318 (272-433) | 412 (337-506)                   | 0.72                           |                             |                                 |                                |                             |
| Asparagine           | < 35         | µmol/ 24 hr | 54     | 104    | 124    | 124    | 376     | 46     | 116    | 41     | 122    | 104    | 80     | 29     | 153    | 164    | 274    | 202    | 81     | 682    | 257     | 169    | 110           | 104 (67-123)       | 167 (121-243)       | 0.07          | 124 (104-124)                   | 119 (81-178)                   | 0.97                        |                                 |                                |                             |
| Glutamic acid        | < 20         | µmol/ 24 hr | 62     | 9      | 6      | 4      | 12      | 4      | 8      | 3      | 10     | 5      | 5      | 6      | 6      | 38     | 3      | 74     | 5      | 6      | 9       | 62     | 11            | 6.18 (4.58-9.38)   | 10.1 (6.08-55.66)   | 0.15          | 8.63 (6.18-11.75)               | 7.32 (4.92-17.75)              | 0.72                        |                                 |                                |                             |
| Glutamine            | < 80         | µmol/ 24 hr | 225    | 259    | 680    | 372    | 1246    | 346    | 331    | 255    | 629    | 464    | 708    | 276    | 446    | 721    | 634    | 718    | 346    | 1375   | 1047    | 523    | 441           | 372 (295-654)      | 579 (442-720)       | 0.15          | 372 (295-654)                   | 494 (346-710)                  | 0.55                        |                                 |                                |                             |
| Proline              | < 10         | µmol/ 24 hr | 62     | ND     | 6      | 4      | 12      | 4      | 8      | 15     | 10     | 5      | 5      | 5      | ND     | 6      | 3      | 9      | 5      | 6      | 9       | 8      | 11            | 7.23 (4.79-11.35)  | 6.32 (5.09-9.18)    | 0.72          | 8.97 (5.74-24.34)               | 6.32 (4.87-9.19)               | 0.47                        |                                 |                                |                             |
| Glycine              | < 200        | µmol/ 24 hr | 1786   | 949    | 1446   | 1424   | 2068    | 1483   | 513    | 708    | 1196   | 1552   | 1465   | 1601   | 981    | 1214   | 1475   | 1785   | 907    | 3827   | 3433    | 1508   | 991           | 1446 (1073-1518)   | 1492 (1047-1739)    | 0.43          | 1446 (1424-1786)                | 1470 (989-1564)                | 0.72                        |                                 |                                |                             |
| Alanine              | < 70         | µmol/ 24 hr | 256    | 242    | 445    | 354    | 705     | 261    | 513    | 87     | 406    | 293    | 399    | 391    | 229    | 341    | 374    | 387    | 194    | 789    | 900     | 369    | 353           | 354 (259-425)      | 372 (344-390)       | 0.86          | 354 (256-445)                   | 372 (285-400)                  | 1.00                        |                                 |                                |                             |
| Valine               | < 15         | µmol/ 24 hr | 70     | 9      | 62     | 35     | 94      | 23     | 50     | 20     | 10     | 28     | 60     | 5      | 51     | 51     | 27     | 55     | 41     | 60     | 110     | 46     | 11            | 35 (22-61)         | 48 (30-54)          | 0.86          | 62 (35-70)                      | 43 (22-52)                     | 0.31                        |                                 |                                |                             |
| Cystine              | < 30         | µmol/ 24 hr | 85     | 69     | 87     | 44     | 282     | 31     | 83     | 36     | 61     | 38     | 50     | 76     | 64     | 89     | 27     | 9      | 31     | 36     | 73      | 62     | 11            | 61 (41-84)         | 49 (28-71)          | 0.25          | 85 (69-87)                      | 44 (31-66)                     | 0.032                       |                                 |                                |                             |
| Methionine           | < 20         | µmol/ 24 hr | 4      | 9      | 6      | 4      | 12      | 4      | 8      | 3      | 10     | 5      | 50     | 5      | 6      | 6      | 3      | 9      | 5      | 48     | 9       | 8      | 11            | 6.18 (4.15-9.38)   | 7.03 (5.4-9.2)      | 0.56          | 6.18 (4.42-8.63)                | 7.03 (4.76-9.44)               | 0.78                        |                                 |                                |                             |
| Isoleucine           | < 6          | µmol/ 24 hr | 39     | 9      | 6      | 4      | 12      | 4      | 8      | 15     | 10     | 5      | 5      | 5      | 6      | 6      | 3      | 9      | 5      | 6      | 9       | 8      | 11            | 8.28 (4.86-10.95)  | 6.35 (5.31-8.81)    | 0.65          | 8.63 (6.18-11.75)               | 6.35 (4.93-9.19)               | 0.40                        |                                 |                                |                             |
| Leucine              | < 15         | µmol/ 24 hr | 4      | 9      | 37     | 27     | 71      | 4      | 8      | 15     | 10     | 5      | 5      | 5      | 6      | 6      | 20     | 9      | 5      | 6      | 92      | 8      | 11            | 8.63 (4.86-20.91)  | 7.03 (6.07-10.56)   | 1.00          | 26.54 (8.63-37.07)              | 7.03 (5.07-10.36)              | 0.21                        |                                 |                                |                             |
| Tyrosine             | < 25         | µmol/ 24 hr | 78     | 69     | 173    | 88     | 306     | 54     | 99     | 25     | 122    | 66     | 90     | 76     | 89     | 114    | 167    | 129    | 5      | 287    | 165     | 62     | 66            | 88 (68-111)        | 101 (69-156)        | 0.81          | 88 (78-173)                     | 89 (65-123)                    | 0.40                        |                                 |                                |                             |
| Phenylalanine        | < 20         | µmol/ 24 hr | 31     | 9      | 74     | 53     | 188     | 31     | 66     | 51     | 10     | 28     | 90     | 76     | 64     | 89     | 47     | 92     | 5      | 120    | 110     | 46     | 11            | 51 (30-70)         | 70 (46-91)          | 0.43          | 53 (31-74)                      | 57 (30-89)                     | 1.00                        |                                 |                                |                             |
| Histidine            | < 160        | µmol/ 24 hr | 411    | 207    | 989    | 637    | 2538    | 369    | 596    | 336    | 1055   | 748    | 458    | 562    | 624    | 1088   | 975    | 1362   | 570    | 2069   | 1542    | 739    | 969           | 596 (390-868)      | 972 (653-1293)      | 0.10          | 637 (411-989)                   | 743 (568-1063)                 | 0.78                        |                                 |                                |                             |
| Tryptophane          | < 10         | µmol/ 24 hr | 62     | ND     | 49     | 4      | 94      | 23     | 50     | 3      | 10     | 5      | 5      | 29     | 38     | 38     | 47     | 55     | 5      | 144    | 55      | 8      | 11            | 17 (5-50)          | 38 (15-53)          | 0.35          | 38 (15-53)                      | 26 (7-47)                      | 0.34                        |                                 |                                |                             |
| Ornithine            | < 5          | µmol/ 24 hr | 4      | 9      | 6      | 4      | 71      | 4      | 8      | 3      | 10     | 5      | 5      | 5      | 6      | 51     | 3      | 9      | 5      | 36     | 9       | 8      | 11            | 4.98 (4.15-8.46)   | 8.44 (5.41-10.56)   | 0.20          | 6.18 (4.42-8.63)                | 7.03 (4.76-9.44)               | 0.97                        |                                 |                                |                             |
| Lysine               | < 60         | µmol/ 24 hr | 140    | 173    | 309    | 115    | 1340    | 61     | 182    | 127    | 122    | 85     | 130    | 95     | 191    | 417    |        |        |        |        |         |        |               |                    |                     |               |                                 |                                |                             |                                 |                                |                             |
